# Supplementary material
Source: MDPI journal article supplement (https://www.mdpi.com/2673-7264/1/3/20)
Supplement: s1 [file s1]

Type of the Paper (Article, Review, Communication, etc.)

# Supplementary Material

E. J. Watkinson <sup>1,†,2,\*</sup>, R. Mesalam <sup>2</sup>, J.-F. Vigier <sup>1</sup>, O. Beneš <sup>1</sup>, J.-C. Griveau <sup>1</sup>, E. Colineau <sup>1</sup>, M. Sierig <sup>1</sup>, D. Freis <sup>1</sup>, R. M. Ambrosi <sup>2</sup>, D. Staicu <sup>1</sup>, and R. J. M. Konings <sup>1</sup>

<sup>1</sup> European Commission, Joint Research Centre (JRC), PO Box 2340, 76125 Karlsruhe, Germany.

<sup>†</sup> Visiting Scientist

<sup>2</sup> University of Leicester, University Road, Leicester, LE1 7RH, United Kingdom; ejw38@leicester.ac.uk

\* Correspondence: ejw38@leicester.ac.uk;

## Low Temperature Heat Capacity Data

The low temperature heat capacity data are according to **Table S.1**

**Table S1:** The experimental low temperature heat capacity data together with its estimated uncertainty of 5 %. This is a conservative estimate. The uncertainty in the temperature is less than 1 % for the temperature within this temperature range.

**Citation:** Watkinson, E.J.; Mesalam, R.; Vigier, J.-F.; Beneš, O.; Griveau, J.-C.; Colineau, E.; Sierig, M.; Freis, D.; Ambrosi, R.M.; Staicu, D.; et al. Thermal Properties and Behaviour of Am-Bearing Fuel in European Space Radioisotope Power Systems. *Thermo* **2021**, *1*, 297–332. <https://doi.org/10.3390/thermo1030020>

Academic Editor: Johan Jacquemin

Received: 30 June 2021

Accepted: 8 October 2021

Published: date

**Publisher's Note:** MDPI stays neutral with regard to jurisdictional claims in published maps and institutional affiliations.

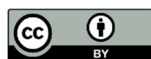

**Copyright:** © 2021 by the authors. Submitted for possible open access publication under the terms and conditions of the Creative Commons Attribution (CC BY) license (<https://creativecommons.org/licenses/by/4.0/>).

| $T$ [K] |   | [K] | $C_p$ [J mol <sup>-1</sup> K <sup>-1</sup> ] |   | [J mol <sup>-1</sup> ] |
|---------|---|-----|----------------------------------------------|---|------------------------|
| 150.7   | ± | 1.5 | 41300.8                                      | ± | 2065.0                 |
| 162.3   | ± | 1.6 | 43615.5                                      | ± | 2180.8                 |
| 170.1   | ± | 1.7 | 44972.1                                      | ± | 2248.6                 |
| 181.8   | ± | 1.8 | 47076.3                                      | ± | 2353.8                 |
| 189.7   | ± | 1.9 | 48263.5                                      | ± | 2413.2                 |
| 197.5   | ± | 2.0 | 49416.6                                      | ± | 2470.8                 |
| 201.4   | ± | 2.0 | 50054.6                                      | ± | 2502.7                 |
| 213.2   | ± | 2.1 | 51834.6                                      | ± | 2591.7                 |
| 225.0   | ± | 2.3 | 53323.1                                      | ± | 2666.2                 |
| 232.9   | ± | 2.3 | 54474.8                                      | ± | 2723.7                 |
